# Supplementary material for: A novel ruthenium polypyridyl complex for the selective imaging and photodynamic targeting of the Golgi apparatus
Source: Royal Society of Chemistry journal article supplement (doi:10.1039/d1dt00216c), 2021-01-01
Supplement: d1dt00216c1.pdf [file d1dt00216c1.pdf]

**A novel ruthenium photosensitizer for Golgi apparatus *in vitro*  
targeted photodynamic applications**

**Supporting Information**

Fengyi Zhao,<sup>a</sup> Weifan Wang<sup>a</sup> and Wenlong Wu<sup>\*a</sup>

<sup>a</sup>Institute of Botany, Jiangsu Province and Chinese Academy of Sciences, Nanjing 210014, Jiangsu, China.

Email: [1964wwl@163.com](mailto:1964wwl@163.com)

**Content:**

- I. Fig. S1** Confocal fluorescence images of HeLa cells (without NBD tracker) incubated with Ru (10  $\mu$ M) and Ru-SL (10  $\mu$ M)
- II. Fig. S2** Confocal fluorescence images of HeLa cells after incubation with Ru-SL complex (10  $\mu$ M) for 2 h after white light irradiation at different time
- III. Fig. S3** Fluorescence spectra of adding Ru-SL complex
- IV. Fig. S4** Absorption spectra of Ru-SL complex
- V. Fig. S5** <sup>1</sup>H NMR (300 MHz, DMSO-d<sub>6</sub>) spectrum of Ru-SL
- VI. Fig. S6** <sup>13</sup>C NMR (101 MHz, DMSO-d<sub>6</sub>) spectrum of Ru-SL
- VII. Fig. S7** Mass spectrometry (ESI) of Ru-SL

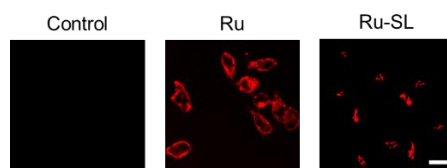

**Fig. S1** Confocal fluorescence images of HeLa cells (without NBD tracker) incubated with Ru (10  $\mu\text{M}$ ) and Ru-SL (10  $\mu\text{M}$ ) at 37  $^{\circ}\text{C}$  for 2 h, without Ru or Ru-SL as a control,  $\lambda_{\text{ex}} = 488 \text{ nm}$ . Scale bar is 10  $\mu\text{m}$ .

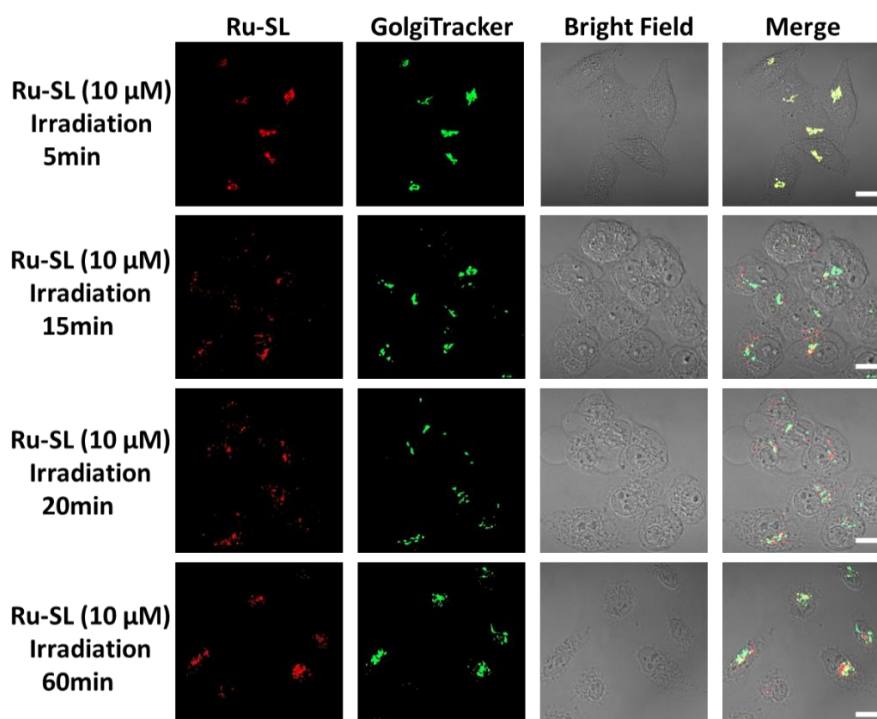

**Fig. S2** Confocal fluorescence images of HeLa cells after incubation with Ru-SL complex (10  $\mu\text{M}$ ) for 2 h after white light irradiation at different time (5.67  $\text{mW}/\text{cm}^2$ ).  $\lambda_{\text{ex}} = 488 \text{ nm}$ . Scale bars = 5  $\mu\text{m}$ .

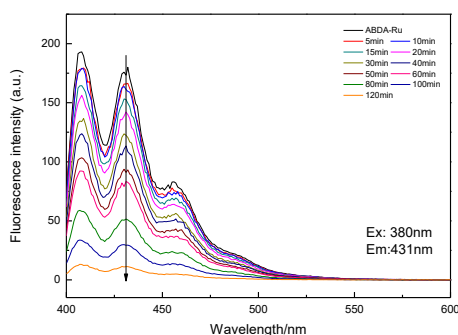

**Fig. S3** Fluorescence spectra of adding Ru-SL complex (5  $\mu\text{M}$ ) into ABDA (30  $\mu\text{M}$ , PBS, pH 7.2),  $\lambda_{\text{ex}} = 380 \text{ nm}$ .

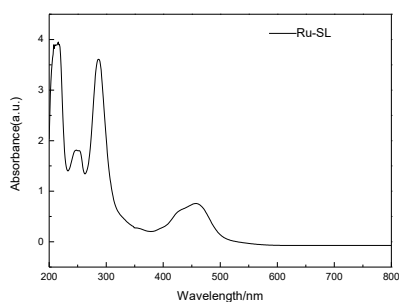

**Fig. S4** Absorption spectra of Ru-SL complex (5  $\mu$ M, PBS, PH 7.2).

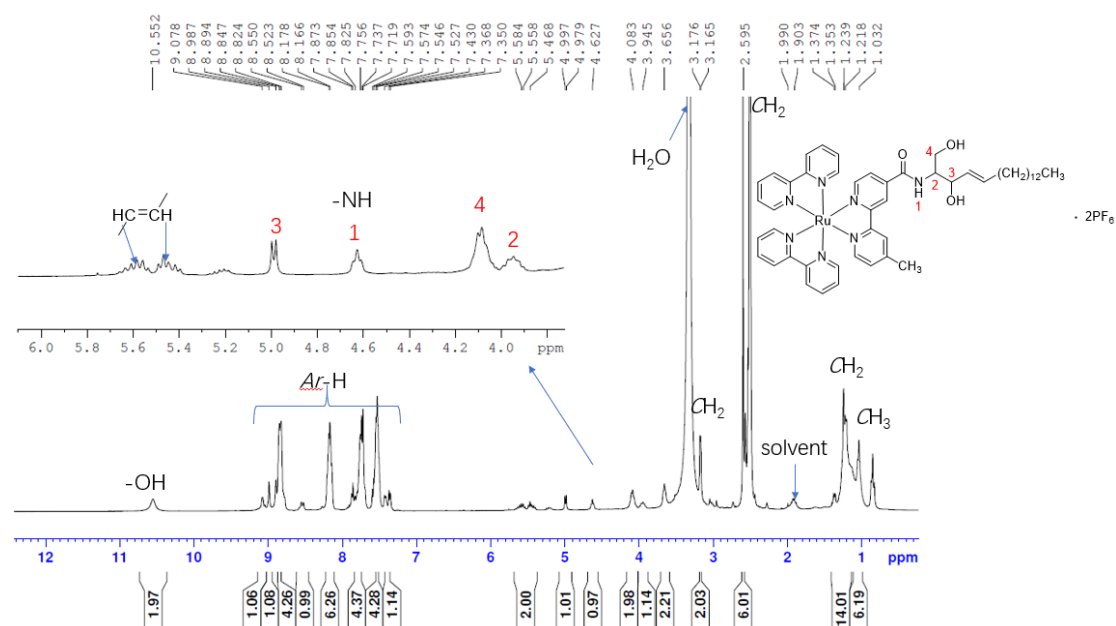

**Fig. S5**  $^1\text{H}$  NMR (300 MHz, DMSO- $d_6$ ) spectrum of Ru-SL.

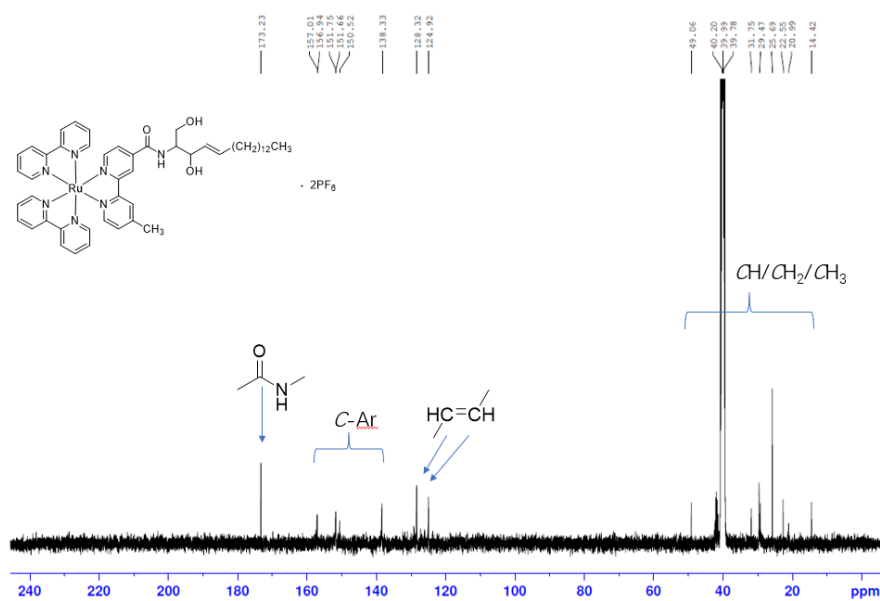

**Fig. S6**  $^{13}\text{C}$  NMR (101 MHz, DMSO- $d_6$ ) spectrum of Ru-SL.

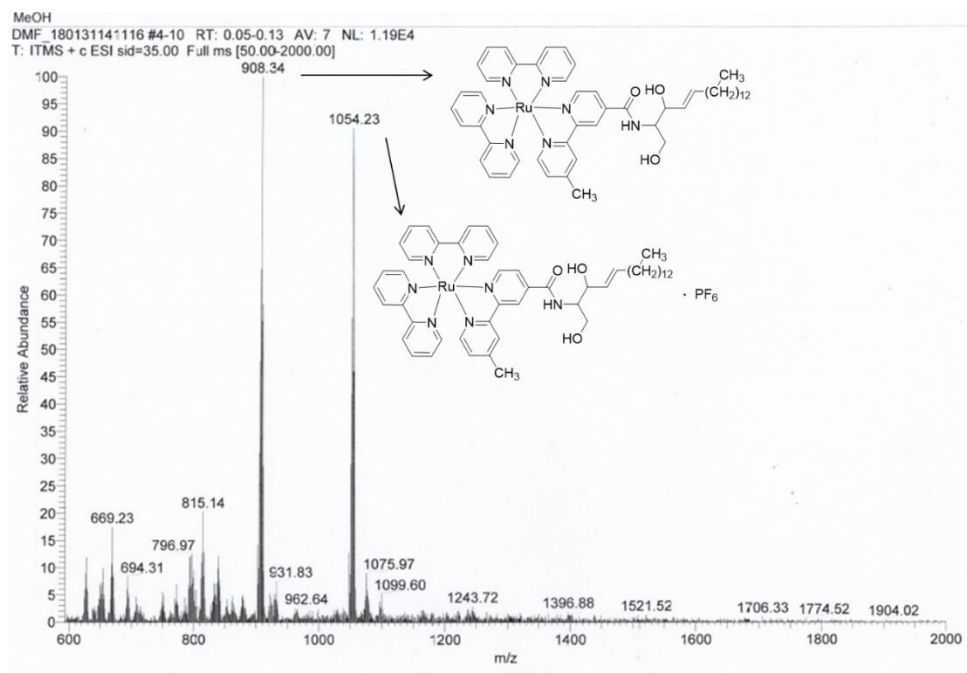

**Fig. S7** Mass spectrometry (ESI) of Ru-SL.
